# Supplementary material for: Heterochronies and allometries in the evolution of the hominid cranium: a morphometric approach using classical anthropometric variables
Source: PeerJ. 2022 Aug 25;10:e13991. doi: 10.7717/peerj.13991 (PMC9420405; doi:10.7717/peerj.13991)
Supplement: Supplemental Information 1 — GOL: glabella-opistocranion length. XCB: maximum biparietal cranial breadth. BBH: basion-bregma height. BPL: basion-prosthion length. NPH: nasion-prosthion height. ZYB: bizygomatic breadth. All measurements are in mm. * indicates measurement taken on photographs for the new specimens included in the database. Bold type indicates measurement taken from 3D models. [file peerj-10-13991-s001.xls]

## Sheet: Values
ID	Species	Group	GOL	BBH	XCB	NPH	BPL	ZYB	Provenance
TM 266-01-060-1	Sahelanthropus tchadensis	Basal Hominin	173	86	92.8	75	132.8	132.8	1, 2	* indicates measurement taken on photographs for the new specimens included in the database
KNM-ER 17000	Paranthropus aethiopicus	Australopitecine	148.5	93.1	100	99	149.4	162	1, 4	Bold type indicates measurement taken on photographs of 3D models
AL 444-2	Australopithecus afarensis	Australopitecine	167	102	122	100	145	167	1, 3
Sts 5	Australopithecus africanus	Australopitecine	146	101	98	77	127	126	4
Sts 71	Australopithecus africanus	Australopitecine	129	88	108	71	100	126	1, 4
KNM-ER 406	Paranthropus boisei	Australopitecine	163	103	112	88	135	179	4
OH 5	Paranthropus boisei	Australopitecine	173	98	116	112	137	168	5
SK 48	Paranthropus robustus	Australopitecine	140.4	91	100	80	97	145	1, 4
DNH 7	Paranthropus robustus	Australopitecine	140.5	88.8	89.3	71.2	98	112.7	1
MRD-VP-1/1	Australopithecus anamensis	Australopitecine	149.2	94.9	83.1	91.1	127.3*	130.3*	33
StW 573	Australopithecus prometheus / A. africanus	Australopitecine	151	104	110	87	112*	130	34
KNM-ER 1470	Homo rudolfensis / H. habilis s.l.	Extinct Homo	166	104	126	90	115	135	4, 6, 7
KNM-ER 1813	Homo habilis	Extinct Homo	145	94.8	102.8	66	98.3	116.8	21
OH 24	Homo habilis	Extinct Homo	145	89	118	67	92	120	1, 4
D3444	Homo georgicus / H. habilis s.l.	Extinct Homo	163	107	122	63	93.8	126.7	1, 9
D 2700	Homo georgicus / H. habilis s.l.	Extinct Homo	155	100	117	63	100	116	7, 8, 10
D 2282	Homo georgicus / H. habilis s.l.	Extinct Homo	163	92	116	81	110	130	7, 8, 9
D4500	Homo georgicus / H. habilis s.l.	Extinct Homo	165	92	109	73	127	149	20
KNM-ER 3733	Homo ergaster / H. erectus s.l.	Extinct Homo	182	108	135	83	120	138	4
WT 15000	Homo ergaster / H. erectus s.l.	Extinct Homo	175	101	124	78	118	121.6	7
Stw 53	Homo gautengensis / H. habilis s.l.	Extinct Homo	167	110	108	70	97	130	1, 11
Sangiran 17	Homo erectus	Extinct Homo	206	110	150	82	118	150	4
Kabwe	Homo rhodesiensis / H. heidelbergensis	Extinct Homo	210	129	144	95	115	144.5	1, 12
SH Cranium 5	Homo heidelbergensis / H. neanderthalensis	Extinct Homo	185	125	146.5	85	115.3	144	13
Steinheim	Homo heidelbergensis	Extinct Homo	185	110	132.5	74.5	109	132	14
Petralona	Homo heidelbergensis	Extinct Homo	208	127	152	90	119	157	15
Shanidar I	Homo neanderthalensis	Extinct Homo	207	135	154	86	117.1	140	16
La Chapelle	Homo neanderthalensis	Extinct Homo	208	131	156	86	124.8	153	12
La Ferrasie I	Homo neanderthalensis	Extinct Homo	207.5	135	158	88	124	148.5	17, 18
LB-1	Homo floresiensis	Extinct Homo	143	89	110	53	88	117	1, 19
LES-1	Homo naledi	Extinct Homo	143	92.4	104	68.1	90.7	112.5	35
HBSM2018-000018(A)	Homo longi	Extinct Homo	221.3	132.6	157.4	76.4	125.1	162.4	36
THK1063	Homo sapiens	AMH (juvenile/infant)	166	137	133	55	87	110	22
THK1082	Homo sapiens	AMH (juvenile/infant)	164	128	133	56	82	114	22
THK235	Homo sapiens	AMH (juvenile/infant)	175	124	133	52	81	112	22
THK395	Homo sapiens	AMH (juvenile/infant)	169	123	130	60	86	111	22
THK408	Homo sapiens	AMH (juvenile/infant)	177	138	139	65	96	122	22
THK502	Homo sapiens	AMH (juvenile/infant)	164	119	130	47	78	97	22
THK553	Homo sapiens	AMH (juvenile/infant)	164	130	142	56	81	109	22
THK589	Homo sapiens	AMH (juvenile/infant)	162	124	133	51	80	105	22
THK754	Homo sapiens	AMH (juvenile/infant)	165	121	131	53	89	114	22
THK 1	Homo sapiens	AMH	194	141	140	68	99	136	22
THK 2	Homo sapiens	AMH	180	140	139	70	103	125	22
THK 62	Homo sapiens	AMH	176	137	134	70	90	124	22
THK 256	Homo sapiens	AMH	183	140	148	76	100	136	22
THK 266	Homo sapiens	AMH	178	138	138	63	105	140	22
THK 281	Homo sapiens	AMH	175	138	135	71	91	130	22
THK 283	Homo sapiens	AMH	189	140	136	62	105	134	22
THK 287	Homo sapiens	AMH	180	134	141	64	95	126	22
THK 320	Homo sapiens	AMH	176	133	127	66	99	131	22
THK 349	Homo sapiens	AMH	191	142	139	66	104	138	22
THK 364	Homo sapiens	AMH	184	140	141	68	102	135	22
THK 376	Homo sapiens	AMH	192	133	140	65	96	130	22
THK 434	Homo sapiens	AMH	178	140	142	65	98	134	22
THK 1058	Homo sapiens	AMH	179	134	142	66	100	137	22
THK 1299	Homo sapiens	AMH	172	126	128	68	89	117	22
THK 1742	Homo sapiens	AMH	183	143	152	67	102	134	22
THK 2544	Homo sapiens	AMH	184	139	144	66	97	131	22
THK 3278	Homo sapiens	AMH	175	130	131	62	104	132	22
THK 3345	Homo sapiens	AMH	179	138	138	74	96	130	22
THK 408	Homo sapiens	AMH	177	138	139	65	96	122	22
THK 302	Homo sapiens	AMH	183	131	133	68	100	130	22
THK 302	Homo sapiens	AMH	182	131	126	69	98	129	22
THK 373	Homo sapiens	AMH	168	134	141	63	88	125	22
THK 387	Homo sapiens	AMH	175	136	137	64	98	122	22
THK 387	Homo sapiens	AMH	176	135	137	63	97	121	22
THK 423	Homo sapiens	AMH	175	129	137	69	97	123	22
THK 439	Homo sapiens	AMH	173	139	136	63	99	128	22
THK 478	Homo sapiens	AMH	164	127	136	61	85	118	22
THK 542	Homo sapiens	AMH	167	121	133	59	88	112	22
THK 569	Homo sapiens	AMH	168	130	132	60	101	121	22
THK 2319	Homo sapiens	AMH	175	130	129	69	100	131	22
THK 3259	Homo sapiens	AMH	181	141	142	70	103	142	22
THK 495	Homo sapiens	AMH	178	132	130	80	95	124	22
THK 503	Homo sapiens	AMH	177	142	137	84	101	122	22
THK 633	Homo sapiens	AMH	175	132	130	77	94	119	22
THK 702	Homo sapiens	AMH	170	126	130	85	94	120	22
THK 2480	Homo sapiens	AMH	169	124	135	80	95	120	22
THK 2506	Homo sapiens	AMH	175	130	144	86	98	129	22
THK 2564	Homo sapiens	AMH	164	133	127	77	91	119	22
LT-146	Homo sapiens	AMH	176	124	132	70	90	121	23
LT-10	Homo sapiens	AMH	185	140	135	64.5	95	118	23
LT-73	Homo sapiens	AMH	179	123.5	130	66	88.5	120	23
LT-178	Homo sapiens	AMH	176.5	129	126	58	93	117	23
LT-160	Homo sapiens	AMH	174	123	127	59	84	117	23
LT-94	Homo sapiens	AMH	183	135	137	76	102	119	23
LT-48	Homo sapiens	AMH	179	123	126	67	94	125.5	23
LT-82	Homo sapiens	AMH	178.5	127	129	64	94	118	23
LT-86	Homo sapiens	AMH	170	132	129	58.1	87	118	23
LT-104	Homo sapiens	AMH	170	127	128	71.5	102	117	23
LT-67	Homo sapiens	AMH	173	135	129	60	88	119	23
LT-166	Homo sapiens	AMH	185	130	140	78	106	123	23
LT-114	Homo sapiens	AMH	182	131.5	128	63	94	127	23
LT-105	Homo sapiens	AMH	176	122	132	65.2	90	118	23
LT-91	Homo sapiens	AMH	170	119	126	64.9	90	116	23
LT-9	Homo sapiens	AMH	179	132	139	64.5	94	122	23
LT-127	Homo sapiens	AMH	172	126	132	64	92	115	23
LT-136	Homo sapiens	AMH	174	122.5	131	68.7	91.5	117	23
LT-172	Homo sapiens	AMH	187	138	142	67	95	125	23
LT-6	Homo sapiens	AMH	177	140	133	70	97	124	23
LT-93	Homo sapiens	AMH	169	129	137	67	92	123.5	23
LT-74	Homo sapiens	AMH	178	126	134	62	90	122	23
LT-96	Homo sapiens	AMH	179	124	130	68.4	94	115	23
LT-134	Homo sapiens	AMH	180	130.5	136	69.2	91.5	123	23
LT-72	Homo sapiens	AMH	174	131	130	59	83	120	23
LT-21	Homo sapiens	AMH	177	135	132	62.5	86	122	23
LT-32	Homo sapiens	AMH	174	132	137.5	63.5	87	121	23
LT-60	Homo sapiens	AMH	180.5	132	132	68	87	121	23
LT-46	Homo sapiens	AMH	171	132	132	67	91	128	23
LT-103	Homo sapiens	AMH	177.5	133	128.5	65.4	87	118	23
LT-79	Homo sapiens	AMH	178	119	131.5	60	92	119	23
LT-83	Homo sapiens	AMH	169	119	130	60	89	117	23
LT-110	Homo sapiens	AMH	170	127	127	65.5	95	120	23
LT-92	Homo sapiens	AMH	187	131	134	68.8	98	130	23
LT-159	Homo sapiens	AMH	184	126.5	131	71.1	94	125	23
LT-141	Homo sapiens	AMH	186	129	139	74.5	96	135.5	23
LT-111	Homo sapiens	AMH	182	138	136	64.7	95.5	121	23
LT-158	Homo sapiens	AMH	179	140	129	66	102	133	23
LT-1	Homo sapiens	AMH	179	132	131	72.5	98	129	23
LT-100	Homo sapiens	AMH	189	145	137	68	92	133	23
LT-57	Homo sapiens	AMH	191	148	144	70	100.5	130	23
LT-71	Homo sapiens	AMH	190	145	142	76.5	94	131	23
LT-179	Homo sapiens	AMH	182	134	138	78.5	102	132	23
LT-84	Homo sapiens	AMH	189	133	137	69	96	127	23
LT-115	Homo sapiens	AMH	185	132	135	66.4	95	129	23
LT-133	Homo sapiens	AMH	187.5	128	144	75.8	95	128	23
LT-145	Homo sapiens	AMH	187	130.5	136	73.4	109	138	23
LT-156	Homo sapiens	AMH	174	134	127	73.5	99	123	23
LT-80	Homo sapiens	AMH	181	134	139	66	90	130	23
LT-88	Homo sapiens	AMH	183.5	132	131.5	72.4	107	129	23
LT-152	Homo sapiens	AMH	183	134	128	65	97	126.5	23
LT-25	Homo sapiens	AMH	183	128	136	72	97	128	23
LT-26	Homo sapiens	AMH	181	133	130	64.3	93.5	114	23
LT-140	Homo sapiens	AMH	194	141	146	70.5	100	136	23
LT-144	Homo sapiens	AMH	187	138	141	66.2	102	129	23
LT-45	Homo sapiens	AMH	192	141.5	141	71	98	137	23
LT-30	Homo sapiens	AMH	188	147	138	79.3	99	132.5	23
LT-1bis	Homo sapiens	AMH	184	134	127	65.5	87	124	23
LT-161	Homo sapiens	AMH	183	134	138	69.3	94.2	125.5	23
LT-118	Homo sapiens	AMH	194	137	144	75.9	104	137	23
LT-27*	Homo sapiens	AMH	167	133	130	65	104	123	23
LT-125	Homo sapiens	AMH	190	135	134	74.5	97	128	23
LT-142	Homo sapiens	AMH	174	135	130	66	100	122	23
LT-121	Homo sapiens	AMH	187	137.5	136	71.6	97	127.5	23
Predmost IV	Homo sapiens	AMH (Pleistocene)	191.5	136.5	143.5	67.2	104.6	136	29, 30, 31, 32
Combe Capelle	Homo sapiens	AMH (Pleistocene)	202	138.5	134	79.4	99.5	137	29, 30, 31, 32
Cro-Magnon I	Homo sapiens	AMH (Pleistocene)	202.5	132.5	149.5	70	102.2	140.5	29, 30, 31, 32
Barma Grande 2	Homo sapiens	AMH (Pleistocene)	205	158	142	72.3	107.1	143.5	29, 30, 31, 32
Chancelade	Homo sapiens	AMH (Pleistocene)	194	148.5	137.5	77.2	105	138.5	29, 30, 31, 32
Obercassel 1	Homo sapiens	AMH (Pleistocene)	195	137.5	143.5	72	97	153	29, 30, 31, 32
Obercassel 2	Homo sapiens	AMH (Pleistocene)	182	134.5	129.5	66.7	86.5	124	29, 30, 31, 32
Abri Pataud	Homo sapiens	AMH (Pleistocene)	183	130	138	66	101	132	29, 30, 31, 32
Cap-Blanc	Homo sapiens	AMH (Pleistocene)	186	138	142	75	101	138	29, 30, 31, 32
Saint-Germain	Homo sapiens	AMH (Pleistocene)	185.5	125	143	69	92.5	134	29, 30, 31, 32
Laugerie Basse N	Homo sapiens	AMH (Pleistocene)	194	148.5	137.5	77.2	105	138.5	29, 30, 31, 32
Abri Lafaye	Homo sapiens	AMH (Pleistocene)	187	134	135	69	103	132	29, 30, 31, 32
Grimaldi I	Homo sapiens	AMH (Pleistocene)	192	135.5	133.5	62.3	100	130	29, 30, 31, 32
Grimaldi II	Homo sapiens	AMH (Pleistocene)	191	133.5	130.5	59.1	105.5	128.5	29, 30, 31, 32
Mladec I	Homo sapiens	AMH (Pleistocene)	198.5	138	142	70	104.2	132.5	29, 30, 31, 32
San Teodoro I	Homo sapiens	AMH (Pleistocene)	197	143	136	67	103	135	29, 30, 31, 32
San Teodoro II	Homo sapiens	AMH (Pleistocene)	192	143	144	66	95	135	29, 30, 31, 32
San Teodoro III	Homo sapiens	AMH (Pleistocene)	195	149	134	73	90	141	29, 30, 31, 32
BOU-VP-16/1	Homo sapiens	AMH (Pleistocene)	219.5	147.5	155	79	111	142	29, 30, 31, 32
Liang Toge	Homo sapiens	AMH	177	128	120	70	103	120	24, 25, 26
Lin112	Homo sapiens	AMH	177	135	128	63.7	87.8	120	23
Lin50	Homo sapiens	AMH	177.5	136	144.5	61.3	85	130.3	23
Lin54	Homo sapiens	AMH	186	130	145	65.8	88	134	23
Lin171	Homo sapiens	AMH	170	121	141	54.5	91.3	128.2	23
Lin149	Homo sapiens	AMH	163	125	134	66.1	93.7	130.2	23
Lin133	Homo sapiens	AMH	179	142	136	66	91	131.3	23
Lin46	Homo sapiens	AMH	171	129.5	133	58	83.4	121.5	23
Lin146	Homo sapiens	AMH	173.5	129	125	65.2	95.5	124	23
Lin74	Homo sapiens	AMH	166	126	124	61.2	84.5	115	23
Lin99	Homo sapiens	AMH	176	130	124	57.7	85.6	115.4	23
Lin80	Homo sapiens	AMH	168.5	123	133	60.5	71.4	114.6	23
Lin71	Homo sapiens	AMH	179	141	150	64.4	85.8	126.2	23
Lin45	Homo sapiens	AMH	177	125.5	132	68	85.5	118.7	23
And1	Homo sapiens	AMH	168	132	134	58	93	121	24, 25, 26
And2	Homo sapiens	AMH	161	128	135	60	94	124	24, 25, 26
And3	Homo sapiens	AMH	165	124	133	61	93	126	24, 25, 26
And4	Homo sapiens	AMH	163	124	135	58	94	123	24, 25, 26
And5	Homo sapiens	AMH	169	131	133	56	92	120	24, 25, 26
And6	Homo sapiens	AMH	169	126	135	62	96	126	24, 25, 26
And7	Homo sapiens	AMH	171	137	140	63	92	125	24, 25, 26
And8	Homo sapiens	AMH	168	131	132	64	96	122	24, 25, 26
And9	Homo sapiens	AMH	165	125	137	61	91	121	24, 25, 26
And10	Homo sapiens	AMH	167	124	139	60	91	121	24, 25, 26
And11	Homo sapiens	AMH	178	133	141	62	100	132	24, 25, 26
And12	Homo sapiens	AMH	166	129	134	64	89	120	24, 25, 26
And13	Homo sapiens	AMH	162	127	136	57	90	122	24, 25, 26
And14	Homo sapiens	AMH	160	127	135	62	89	125	24, 25, 26
And15	Homo sapiens	AMH	151	118	125	57	85	118	24, 25, 26
And16	Homo sapiens	AMH	159	131	133	52	89	123	24, 25, 26
And17	Homo sapiens	AMH	161	122	131	54	90	119	24, 25, 26
And18	Homo sapiens	AMH	159	122	125	56	93	112	24, 25, 26
And19	Homo sapiens	AMH	164	123	133	63	96	119	24, 25, 26
And20	Homo sapiens	AMH	159	127	134	52	89	114	24, 25, 26
And21	Homo sapiens	AMH	159	118	136	59	95	124	24, 25, 26
And22	Homo sapiens	AMH	158	125	130	57	91	114	24, 25, 26
And23	Homo sapiens	AMH	156	123	131	56	93	117	24, 25, 26
And24	Homo sapiens	AMH	158	125	134	55	87	116	24, 25, 26
And25	Homo sapiens	AMH	155	119	130	57	91	119	24, 25, 26
And26	Homo sapiens	AMH	154	119	118	54	86	117	24, 25, 26
And27	Homo sapiens	AMH	167	130	132	61	89	119	24, 25, 26
And28	Homo sapiens	AMH	162	126	127	57	88	118	24, 25, 26
And29	Homo sapiens	AMH	156	122	130	55	89	119	24, 25, 26
And30	Homo sapiens	AMH	156	117	129	56	91	106	24, 25, 26
And31	Homo sapiens	AMH	159	123	132	58	91	126	24, 25, 26
And32	Homo sapiens	AMH	174	135	146	59	90	122	24, 25, 26
And33	Homo sapiens	AMH	161	126	129	59	95	125	24, 25, 26
And34	Homo sapiens	AMH	164	119	137	55	89	118	24, 25, 26
And35	Homo sapiens	AMH	171	136	128	61	94	118	24, 25, 26
And36	Homo sapiens	AMH	164	131	132	60	92	127	24, 25, 26
And37	Homo sapiens	AMH	170	132	137	59	92	116	24, 25, 26
And38	Homo sapiens	AMH	168	132	134	58	93	121	24, 25, 26
PAL10	Gorilla gorilla	G. gorilla (juvenile/infant)	158	102.5	102	83.7	152	137	37
PAL6	Gorilla gorilla	G. gorilla (juvenile/infant)	153.5	98	98	107.3	153.7	138.4	37
PAL236	Gorilla gorilla	G. gorilla (juvenile/infant)	150	97.5	101.5	101.8	160	135.9	37
PAL249	Gorilla gorilla	G. gorilla (juvenile/infant)	152.5	92	104	99.1	155	132.1	37
USNM 599169	Gorilla gorilla	G. gorilla (juvenile/infant)	130.6	90	101.2	67.3	94.7	96.3	38
14	Gorilla gorilla	G. gorilla	157.8	99.8	106	106.7	164	148.5	27
1691	Gorilla gorilla	G. gorilla	163.6	98.5	103	115.2	162.4	141.2	27
1765	Gorilla gorilla	G. gorilla	154.8	100.2	107	96.2	152.1	140.4	27
6592	Gorilla gorilla	G. gorilla	164.3	98	105	112.7	175	140.4	27
6593	Gorilla gorilla	G. gorilla	163.1	100.8	98.8	98	164	140.2	27
6594	Gorilla gorilla	G. gorilla	152.8	93.5	103	99.3	143.5	135.2	27
6595	Gorilla gorilla	G. gorilla	152.7	94	97.5	115.5	169.5	150.4	27
6596	Gorilla gorilla	G. gorilla	148.7	101	102.5	100.6	148.2	141.1	27
6676	Gorilla gorilla	G. gorilla	163.3	94.2	99	106.3	157.8	147.7	27
6600	Gorilla gorilla	G. gorilla	148.7	93	103.2	100.4	155	143.3	27
6601	Gorilla gorilla	G. gorilla	151.9	92.2	103.5	107.8	159	149.1	27
6699	Gorilla gorilla	G. gorilla	157.6	101.2	99.5	115.7	163.2	150.8	27
6840	Gorilla gorilla	G. gorilla	152	100.2	98	96.6	156	136.2	27
7118	Gorilla gorilla	G. gorilla	154.7	99.5	102.5	109.6	165.8	147.4	27
241	Gorilla gorilla	G. gorilla	193.7	105.2	96	112.6	183	179.4	27
917	Gorilla gorilla	G. gorilla	174.7	100	104	118.7	180.5	163	27
6603	Gorilla gorilla	G. gorilla	214.2	108.5	102	140.6	198	181.8	27
6602	Gorilla gorilla	G. gorilla	214.1	102.2	99.5	122.5	200	173.1	27
1648	Gorilla gorilla	G. gorilla	193.8	100	100.5	122.5	199	185	27
252	Gorilla gorilla	G. gorilla	185	106	102.5	110.6	195.8	170.2	27
240	Gorilla gorilla	G. gorilla	217.8	104.5	104.5	122.6	194.8	179.5	27
1444	Gorilla gorilla	G. gorilla	191.7	98	114	141.9	205	178.2	27
250	Gorilla gorilla	G. gorilla	182	100.5	101	122.7	202.8	177.3	27
760	Gorilla gorilla	G. gorilla	172.4	104	107.5	121.5	206.2	176	27
238	Gorilla gorilla	G. gorilla	211.4	106	104.5	124.4	197.1	175.1	27
8	Gorilla gorilla	G. gorilla	198.8	106.5	95	123.1	208.6	171.3	27
11	Gorilla gorilla	G. gorilla	198.7	100.5	101	115.4	199.5	178.1	27
6504	Gorilla gorilla	G. gorilla	186.2	106	106.8	110.9	202.1	176.9	27
6599	Gorilla gorilla	G. gorilla	173.9	104.5	104.5	126.8	177	164.6	27
29045	Pan paniscus	P. paniscus	128	85.5	100	72.1	104.5	112.8	28
29042	Pan paniscus	P. paniscus	126	87	102.5	73.6	102.6	115.2	28
15295	Pan paniscus	P. paniscus	124.8	83.5	92.5	80	114	120.5	28
27698	Pan paniscus	P. paniscus	118.2	84.8	89.5	79.4	110	105.5	28
15293	Pan paniscus	P. paniscus	122	89	97.5	76	117.6	118.7	28
29035	Pan paniscus	P. paniscus	124.7	88	98	82.7	108.8	115.9	28
15296	Pan paniscus	P. paniscus	121.2	88.8	98	71.2	107.2	109.6	28
84-036M-04	Pan paniscus	P. paniscus	123.3	87.4	96.8	77.9	101.6	105.6	28
29060	Pan paniscus	P. paniscus	128.9	82	98.6	78.5	112.5	108.7	28
29040	Pan paniscus	P. paniscus	129	88	102.3	74.8	113.5	113	28
13201	Pan paniscus	P. paniscus	124.3	86	100.5	65.9	102.2	109	28
84-036M-02	Pan paniscus	P. paniscus	128.2	88.4	100.5	75	115	126.7	28
13202	Pan paniscus	P. paniscus	125	87	91.2	72.5	111.3	115.2	28
29052	Pan paniscus	P. paniscus	119.9	82.5	92	76.7	107.1	116.3	28
15294	Pan paniscus	P. paniscus	124.5	85	89.5	69.2	113.1	112.4	28
29063	Pan paniscus	P. paniscus	122.4	87.3	98.5	78.4	111.3	127.6	28
27699	Pan paniscus	P. paniscus	125.3	91	96	74.8	107.1	118.1	28
23509	Pan paniscus	P. paniscus	118.3	83.1	90.3	77.9	105	103.7	28
29047	Pan paniscus	P. paniscus	128.5	88	98	72.1	109.2	113.2	28
29036	Pan paniscus	P. paniscus	126.3	82.5	97	77.2	98	110.3	28
AS1761	Pan troglodytes	P. troglodytes (juvenile/infant)	118.5	84	96	75.8	111.5	102.9	37
AS1188	Pan troglodytes	P. troglodytes (juvenile/infant)	123.6	87.6	97.2	59.3	105	108.3	37
AM10167	Pan troglodytes	P. troglodytes (juvenile/infant)	132.2	92.5	104.5	65.5	109	100.5	37
AM5686	Pan troglodytes	P. troglodytes (juvenile/infant)	136	95	104	76.7	121	127.5	37
AM5687	Pan troglodytes	P. troglodytes (juvenile/infant)	131.9	89	96	71.3	126	116	37
USNM 220068	Pan troglodytes	P. troglodytes (juvenile/infant)	116	81.9	93.4	49	78.3	86.4	38
USNM 220067	Pan troglodytes	P. troglodytes (juvenile/infant)	118.2	85.1	95.9	62.8	88.7	89.6	38
USNM 174709	Pan troglodytes	P. troglodytes (juvenile/infant)	112.2	81	90.8	65.4	76.1	92.4	38
USNM 174708	Pan troglodytes	P. troglodytes (juvenile/infant)	121.7	81.2	96.5	70.3	102	98.4	38
DUNUC 2404	Pan troglodytes	P. troglodytes (juvenile/infant)	105.5	77.3	87.2	52.1	80.4	79.8	39
22925	Pan troglodytes	P. troglodytes	139.5	85.8	97.9	84.3	141.7	126.7	28
2298	Pan troglodytes	P. troglodytes	136.4	90.6	102	90.2	137.3	133.4	28
27697	Pan troglodytes	P. troglodytes	141.3	90.4	100.2	84.2	137.5	131.7	28
2488	Pan troglodytes	P. troglodytes	135.4	88.1	103.2	90.4	139.5	129.8	28
7004/7003	Pan troglodytes	P. troglodytes	130.1	94.8	102.7	82.5	140.3	125.2	28
25534	Pan troglodytes	P. troglodytes	140.2	91.1	104.6	90.1	138.9	137.2	28
17664	Pan troglodytes	P. troglodytes	138.4	85.9	98.2	81.9	144.2	127.7	28
286	Pan troglodytes	P. troglodytes	143.5	90.8	107.2	96.8	144	138.4	28
11362	Pan troglodytes	P. troglodytes	131.2	91.3	105	85.4	124.7	120.7	28
29078	Pan troglodytes	P. troglodytes	125.4	83.2	100.3	81.4	124.5	122.4	28
1048	Pan troglodytes	P. troglodytes	134	90	101	87.2	144	131	28
1554	Pan troglodytes	P. troglodytes	132.5	91.9	100	95.9	143.2	135.7	28
730	Pan troglodytes	P. troglodytes	133.5	91.6	100.8	76.7	129.5	134.3	28
15350	Pan troglodytes	P. troglodytes	140.6	88.6	103.9	83.6	133.6	135.7	28
11363	Pan troglodytes	P. troglodytes	137.2	90.5	102.5	90.3	133.8	134.5	28
7426	Pan troglodytes	P. troglodytes	136.8	91.9	98.3	74.8	144.2	125.7	28
9931	Pan troglodytes	P. troglodytes	133.4	84.9	96	77.4	139	116	28
4188	Pan troglodytes	P. troglodytes	134.4	90.3	100.9	90	131.5	128.6	28
5891	Pan troglodytes	P. troglodytes	138	88.5	101.2	82.8	133.9	130.1	28
5892	Pan troglodytes	P. troglodytes	124.1	83.7	98.4	85.3	134	116.5	28
5717	Pan troglodytes	P. troglodytes	130.3	89.9	95.5	73.6	123	121.9	27
5720	Pan troglodytes	P. troglodytes	136.8	85.2	103.5	90.3	121	121.4	27
6607	Pan troglodytes	P. troglodytes	130.6	85.9	90.2	83.9	137.5	115.2	27
6608	Pan troglodytes	P. troglodytes	126.7	88.5	95.5	82.1	133.5	113.7	27
6871	Pan troglodytes	P. troglodytes	132.9	82.9	94.9	81.8	129	127.5	27
6873	Pan troglodytes	P. troglodytes	134.5	90.5	101	92.7	142	122.4	27
7078	Pan troglodytes	P. troglodytes	126.2	90.3	100	89.8	141	122.4	27
7127	Pan troglodytes	P. troglodytes	130.2	89.3	87.5	84.1	133.5	114.9	27
7688	Pan troglodytes	P. troglodytes	130.7	90.5	97	93.7	137	118	27
7691	Pan troglodytes	P. troglodytes	135.5	85	96	80.9	136	123.5	27
5722	Pan troglodytes	P. troglodytes	138.6	87.6	100.5	93.3	138.7	132.6	27
6605	Pan troglodytes	P. troglodytes	136.4	87.8	100	72.2	138	133.4	27
6606	Pan troglodytes	P. troglodytes	138.2	92.9	95.5	90.7	146.5	133.1	27
5719	Pan troglodytes	P. troglodytes	130.6	85.5	96.8	88.7	136	129.5	27
5288	Pan troglodytes	P. troglodytes	136.7	85.2	101	87	133.8	133.2	27
5721	Pan troglodytes	P. troglodytes	131.1	83.9	101	92.6	134	140.5	27
1223	Pan troglodytes	P. troglodytes	136.8	88.5	94.5	83.3	125	129.7	27
251	Pan troglodytes	P. troglodytes	134.6	89.1	102.2	92.4	129.5	134.5	27
524	Pan troglodytes	P. troglodytes	124.3	84.3	96.5	88.9	132	125.7	27
1443	Pan troglodytes	P. troglodytes	130	82.2	92.5	83.5	139.5	132	27
6839	Pan troglodytes	P. troglodytes	126.9	89.1	95	88.8	137	133.2	27
7008	Pan troglodytes	P. troglodytes	130	88.8	100.8	96.7	133.8	122.7	27
312	Pan troglodytes	P. troglodytes	136.6	87	100	82.4	136.5	126.6	27
11780	Pan troglodytes	P. troglodytes	126.4	82.3	93.5	83.5	125.8	123.8	27
11786	Pan troglodytes	P. troglodytes	120	88.5	92.5	85	136.2	118	27
6253	Pan troglodytes	P. troglodytes	127.1	84.1	90.5	78.9	128.2	124.8	27
6254	Pan troglodytes	P. troglodytes	133.4	87.7	102	88.6	137	127.1	27
6255	Pan troglodytes	P. troglodytes	133.7	82.6	97.5	85.3	138.1	124.1	27
6256	Pan troglodytes	P. troglodytes	132	95.8	101.5	78.4	133.4	123.8	27
6533	Pan troglodytes	P. troglodytes	130.4	87.5	98.8	75.3	130.2	123.2	27
7989	Pan troglodytes	P. troglodytes	132.8	90.4	93	80.4	130.6	119.9	27
6252	Pan troglodytes	P. troglodytes	143.7	97.9	99.8	80.9	138.9	128.3	27
6324	Pan troglodytes	P. troglodytes	134.5	83.8	99.6	81.4	141	131.2	27
7993	Pan troglodytes	P. troglodytes	132.8	86.3	96.5	92	142.4	129.4	27
USNM 396920	Pongo pygmaeus	P. pygmaeus (juvenile/infant)	113.3	86.9	94.8	46.6	82.3	76.8	38
USNM 292562	Pongo pygmaeus	P. pygmaeus (juvenile/infant)	101	84.8	86.7	45.6	76	75.4	38
USNM 283737	Pongo pygmaeus	P. pygmaeus (juvenile/infant)	106.2	82.4	84.7	63.1	91.8	87.3	38
USNM 197665	Pongo pygmaeus	P. pygmaeus (juvenile/infant)	118.2	87.7	105.2	60.9	95.1	94.8	38
USNM 153824	Pongo pygmaeus	P. pygmaeus (juvenile/infant)	117.7	94	95.8	84.1	133.2	122.3	38
USNM 153811	Pongo pygmaeus	P. pygmaeus (juvenile/infant)	119.5	91.5	99	67.2	126.8	119.3	38
USNM 145307	Pongo pygmaeus	P. pygmaeus (juvenile/infant)	123.8	87.2	101.7	92	147.5	131.8	38
USNM 143599	Pongo pygmaeus	P. pygmaeus (juvenile/infant)	110.3	90.9	90.8	65.5	98.1	97.1	38
USNM 143595	Pongo pygmaeus	P. pygmaeus (juvenile/infant)	112	82.3	90.1	67.1	101.6	96.2	38
USNM 142171	Pongo pygmaeus	P. pygmaeus (juvenile/infant)	111.4	86.9	93.1	62.8	99.9	94.8	38
1989	Pongo pygmaeus	P. pygmaeus	114	89	91.8	78.7	132	128.9	27
1990	Pongo pygmaeus	P. pygmaeus	115.2	95	84.5	75.7	123.5	119.7	27
1988	Pongo pygmaeus	P. pygmaeus	118.5	90.2	90.5	100.2	142	136.5	27
1467	Pongo pygmaeus	P. pygmaeus	115.2	95.1	88	79.3	134.5	122.2	27
1565	Pongo pygmaeus	P. pygmaeus	113	89.9	90	89.1	146	127.3	27
1564	Pongo pygmaeus	P. pygmaeus	110.3	90.5	87	82.5	137	118.2	27
1565	Pongo pygmaeus	P. pygmaeus	113.9	89.9	88.2	88.8	144	127.1	27
101	Pongo pygmaeus	P. pygmaeus	130.7	106	96.8	113.9	173	164.6	27
1561	Pongo pygmaeus	P. pygmaeus	127.4	91.8	92.5	112.1	170.5	157.1	27
1986	Pongo pygmaeus	P. pygmaeus	118.7	102	99.5	107.5	180.3	161.2	27
7398	Pongo pygmaeus	P. pygmaeus	127.5	98	94	105.9	175.5	164.2	27
1159	Pongo pygmaeus	P. pygmaeus	139.5	92	93.5	131.4	190	173.2	27
1562	Pongo pygmaeus	P. pygmaeus	132.5	95	100.5	93.9	166	162.9	27
1563	Pongo pygmaeus	P. pygmaeus	127.8	104.2	98	101.8	156.8	154.4	27

## Sheet: Provenance
1	Pérez-Claros, J. A., Jiménez-Arenas, J. M., & Palmqvist, P. (2015). Neurocranium versus face: a morphometric approach with classical anthropometric variables for characterizing patterns of cranial integration in extant hominoids and extinct hominins. PloS one, 10(7), e0131055.
2	Zollikofer CPE, Ponce de Leon MS, Lieberman DE, Guy F, Pilbeam D, Likius A, Mackaye HT, Vignaud P, Brunet M. Virtual cranial reconstruction of Sahelanthropus tchadensis. Nature. 2005;434: 755-­‐759.
3	Kimbel WH, Johanson DC, Rak Y. The skull of Australopithecus afarensis. Oxford: Oxford University Press; 2004.
4	Wood BA. Hominid cranial remains. Koobi For. Research Project 4. Oxford: Clarendon; 1991.
5	Benazzi S, Bookstein FL, Strait DS, Weber GW. A new OH5 reconstruction with an assessment of its uncertainty. J Hum Evol. 2011;61: 75-­‐88.
6	Hawks J, Wolpoff MH. Endocranial Capacity of Early Hominids. Science.1999;283: 5398.
7	de Lumley MA, Gabounia L, Vekua A, Lordkipanidze D. Les restes humains du Pliocene final et du debut du Pleistocene inferieur de Dmanissi, Georgie (1991-­‐2000). I-­‐Les cranes, D 2280, D 2282, D 2700. L'Anthropologie. 2006;110: 1-­‐110.
8	Lordkipanidze D, Vekua A, Ferring R, Rightmire GP, Agusti J, Kiladze G, Mouskhelishvili A, Nioradze M, de Leon MSP, Tappen M, Zollikofer CPE. The earliest toothless hominin skull. Nature. 2005; 434: 717-718.
9	Gabunia L, Vekua A, Lordkipanidze D, Swisher CC, III, Ferring R, Justus A, Nioradze M, Tvalchrelidze M, Anton SC, Bosinski G, Joris O, Lumley M-Ad, Majsuradze G, Mouskhelishvili A. Earliest Pleistocene Hominid Cranial Remains from Dmanisi, Republic of Georgia: Taxonomy, Geological Setting, and Age. Science. 2000; 288:1019-1025.
10	Vekua A, Lordkipanidze D, Rightmire GP, Agusti J, Ferring R, Maisuradze G, Mouskhelishvili A, Nioradze M, de Leon MP, Tappen M, Tvalchrelidze M, Zollikofer C. A New Skull of Early Homo from Dmanisi, Georgia. Science. 2002;297: 85-89.
11	Curnoe D, Tobias PV. Description, new reconstruction, comparative anatomy, and classification of the Sterkfontein Stw 53 cranium, with discussions about the taxonomy of other southern African early Homo remains. J Hum Evol. 2006;50: 36-77.
12	Weidenreich F. The skull of Sinanthropus pekinensis: a comparative study on a primitive hominid skull. Palaeontol. Sin. 1943;D10: 1−485.
13	Arsuaga JL, Martinez I, Gracia A, Lorenzo C. The Sima de los Huesos crania (Sierra de Atapuerca, Spain). A comparative study. J Hum Evol. 1997;33: 219-281.
14	Howell FC. European and Northwest African Middle Pleistocene Hominids. Curr Anthropol. 1960;1: 195-232.
15	Murrill RI. Petralona Man. A Descriptive and Comparative Study, with New Information on Rhodesian Man. Springfield: Charles C. Thomas Pub. Ltd; 1981.
16	Trinkaus E. The Shanidar Neandertals. Academic Press, New York; 1983.
17	Vandermeersch B. Les hommes fossiles de Qafzeh (Israel). Paris: Centre National de la Recherche Scientifique; 1981.
18	Suzuki H, Takai F. The Amud Man and His Cave Site. Tokyo: University of Tokyo; 1970.
19	Brown P, Sutikna T, Morwood MJ, Soejono RP, Jatmiko, Wayhu Saptomo E, Awe Due R. A new small-bodied hominin from the Late Pleistocene of Flores, Indonesia. Nature. 2004; 431: 1055- 1061.
20	Lordkipanidze D, Ponce de León, MS, Margvelashvili A, Rak Y, Rightmire GP, Vekua A, Zollikofer CPE. A complete skull from Dmanisi, Georgia, and the evolutionary biology of early Homo. Science. 2013; 342: 326-331.
21	Benazzi S, Gruppioni G, Strait DS, Hublin JJ. Technical Note: Virtual reconstruction of KNM- ER 1813 Homo habilis cranium. Am J Phys Anthropol. 2014; 153: 154-160.
22	Brown P. (1998–2003) Australian and Asian Palaeoanthropology. https://peterbrown-palaeoanthropology.net/resource.html
23	Physical Anthropology Laboratory, University of Granada, Spain.
24	Howells WW. Cranial variation in man. A study by multivariate analysis of patterns of differences among recent human populations. Pap. Peabody Mus. Archaeol. Ethnol. 1973; 67: 1–259.
25	Howells WW. Skull Shapes and the Map. Craniometric analyses in the dispersion of modern Homo. Pap. Peabody Mus. Archaeol. Ethnol. 1989; 79: 1–189.
26	Howells WW. Who’s who in skulls. Ethnic identification of crania from measurements. Pap. Peabody Mus. Archaeol. Ethnol. 1995; 82: 1–108.
27	Anthropological Institute and Museum, University of Zurich, Switzerland.
28	Royal Museum of Central Africa, Tervuren, Belgium.
29	White TD, Asfaw B, DeGusta D, Gilbert H, Richards GD, Suwa G, et al. Pleist cene Homo sapiens from Middle Awash, Ethiopia. Nature. 2003; 423: 742–747. PMID: 12802332
30	Jacob T. Some Problems Pertaining to the Racial History of the Indonesian Region. A Study of Human Skeletal and Dental Remains from Several Prehistoric Sites in Indonesia and Malaysia. Utrecht: Druk- kerij Neerlandia; 1967.
31	Riquet R. La race de Cro-Magnon: Abus de langage ou réalité objective? In: Camps G, Olivier G, edi- tors. L'Homme de Cro-Magnon. Antrhopologie et archéologie. Paris: Arts et Metiers Graphiques; 1970. pp. 37–58.
32	Vandermeersch B. Les hommes fossiles de Qafzeh (Israel). Paris: Centre National de la Recherche Scientifique; 1981.
33	Haile-Selassie, Y., Melillo, S. M., Vazzana, A., Benazzi, S., & Ryan, T. M. (2019). A 3.8-million-year-old hominin cranium from Woranso-Mille, Ethiopia. Nature, 573(7773), 214-219.
34	Clarke, R. J., & Kuman, K. (2019). The skull of StW 573, a 3.67 ma Australopithecus prometheus skeleton from Sterkfontein Caves, South Africa. Journal of Human Evolution, 134, 102634.
35	Laird, M. F., Schroeder, L., Garvin, H. M., Scott, J. E., Dembo, M., Radovčić, D., ... & de Ruiter, D. J. (2017). The skull of Homo naledi. Journal of Human Evolution, 104, 100-123. / Hawks, J., Elliott, M., Schmid, P., Churchill, S. E., de Ruiter, D. J., Roberts, E. M., ... & Berger, L. R. (2017). New fossil remains of Homo naledi from the Lesedi Chamber, South Africa. Elife, 6, e24232.
36	Ni, X., Ji, Q., Wu, W., Shao, Q., Ji, Y., Zhang, C., ... & Stringer, C. (2021). Massive cranium from Harbin in northeastern China establishes a new Middle Pleistocene human lineage. The Innovation. https://doi.org/10.1016/j.xinn.2021.100130
37	Anthropological Institute and Museum, University of Zurich
38	3D models from the Smithsonian Institution (https://www.morphosource.org)
39	3D models from D’Arcy Thompson Zoology Museum at the University of Dundee. (https://sketchfab.com)
