# Supplementary material for: Heterochronies and allometries in the evolution of the hominid cranium: a morphometric approach using classical anthropometric variables
Source: PeerJ. 2022 Aug 25;10:e13991. doi: 10.7717/peerj.13991 (PMC9420405; doi:10.7717/peerj.13991)
Supplement: Supplemental Information 2 — Estimates of body mass (BM) and endocranial volume (ECV) in kilograms and cubic centimeters, respectively. [file peerj-10-13991-s002.xls]

## Sheet: Variables
		Specimen	Species	Age (kyr)	BM (kg) / Reference	ECV (cc) / Reference	EQ*
	Australopithecines	MRD-VP-1/1	Australopithecus anamensis	3800	55.2 [s1]	368 [s9]	1.54664
		StW 573	Australopithecus prometheus	3670	40.0 [s1]	408 [s11]	2.18781
		AL 444-2	Australopithecus afarensis	3200	76.0 [s3]	500 [s10]	1.63812
		Sts 5	Australopithecus africanus	2010	27.9 [s2]	487 [s10]	3.42398
		Sts 71	Australopithecus africanus	2010	26.6 [s2]	460 [s10]	3.34713
		KNM-ER 17000	Paranthropus aethiopicus	2520	37.7 [s2]	410 [s10]	2.30105
		OH 5	Paranthropus boisei	1830	57.6 [s2]	613 [s10]	2.46665
		KNM-ER 406	Paranthropus boisei	1580	69.8 [s2]	518 [s10]	1.80924
		SK 48	Paranthropus robustus	1775	46.8 [s2]	600 [s10]	2.82825
	Homo (Fossils)	KNM-ER 1470	Homo rudolfensis / H. habilis s.l.	1900	45.6 [s2]	776 [s10]	3.70923
		D4500	Homo georgicus / H. habilis s.l.	1815	48.5 [s4]	546 [s12]	2.51135
		OH 24	Homo habilis	1800	30.3 [s2]	58 2[s10]	3.82289
		KNM-ER 1813	Homo habilis	1650	34.9 [s2]	506 [s10]	2.99719
		KNM-ER 3733	Homo ergaster / H. erectus s.l.	1630	59.2 [s2]	825 [s10]	3.23025
		WT 15000	Homo ergaster / H. erectus s.l.	1500	53.5 [s1]	880 [s10]	3.71396
		Sangiran 17	Homo erectus	800	76.1 [s2]	1020 [s10]	3.28305
		SH Cranium 5	Homo neanderthalensis	350	94.3 [s5]	1390 [s10]	3.77311
		Kabwe	Homo rhodesiensis / H. heidelbergensis	300	118.9 [s2]	1310 [s10]	2.98481
		LES-1	Homo naledi	286	37.4 [s7]	610 [s13]	3.40934
		Steinheim	Homo heidelbergensis	250	60.5 [s2]	1121 [s10]	4.28412
		La Ferrasie I	Homo neanderthalensis	72	99.5 [s2]	1663 [s10]	4.31273
		La Chapelle	Homo neanderthalensis	52	100.3 [s2]	1604 [s10]	4.14173
		Cro-Magnon I	AMH (Upper Pleistocene)	28	69.0 [s8]	1616 [s10]	5.539
		Predmost IV	AMH (Upper Pleistocene)	26	69.7 [s1]	1423 [s10]	4.85448
		Barma Grande 2	AMH (Upper Pleistocene)	24.8	79.8 [s1]	1814 [s10]	5.55237
		LB-1	Homo floresiensis	18	33.0 [s6]	417 [s14]	2.58674
		* Calculated following [s15]

## Sheet: References
	References
	s1	Ruff, C. B., Squyres, N., & Junno, J. A. (2020). Body mass estimation in hominins from humeral articular dimensions. American journal of physical anthropology, 173(3), 480-499.
	s2	Kappelman, J. (1996). The evolution of body mass and relative brain size in fossil hominids. Journal of Human Evolution, 30(3), 243-276.
	s3	Ward, C. V., Kimbel, W. H., Harmon, E. H., & Johanson, D. C. (2012). New postcranial fossils of Australopithecus afarensis from Hadar, Ethiopia (1990–2007). Journal of Human Evolution, 63(1), 1-51.
	s4	Lordkipanidze, D., de León, M. S. P., Margvelashvili, A., Rak, Y., Rightmire, G. P., Vekua, A., & Zollikofer, C. P. (2013). A complete skull from Dmanisi, Georgia, and the evolutionary biology of early Homo. Science, 342(6156), 326-331.
	s5	Arsuaga, J. L., Lorenzo, C., Carretero, J. M., Gracia, A., Martínez, I., García, N., ... & Carbonell, E. (1999). A complete human pelvis from the Middle Pleistocene of Spain. Nature, 399(6733), 255-258.
	s6	Vančata, V. (2005). A preliminary analysis of long bone measurements of Homo floresiensis: Bone robusticity, body size, proportions and encephalisation. Anthropologie (1962-), 43(2/3), 273-282.
	s7	Garvin, H. M., Elliott, M. C., Delezene, L. K., Hawks, J., Churchill, S. E., Berger, L. R., & Holliday, T. W. (2017). Body size, brain size, and sexual dimorphism in Homo naledi from the Dinaledi Chamber. Journal of Human Evolution, 111, 119-138.
	s8	Thibeault, A., & Villotte, S. (2018). Disentangling Cro-Magnon: a multiproxy approach to reassociate lower limb skeletal remains and to determine the biological profiles of the adult individuals. Journal of Archaeological Science: Reports, 21, 76-86.
	s9	Haile-Selassie, Y., Melillo, S. M., Vazzana, A., Benazzi, S., & Ryan, T. M. (2019). A 3.8-million-year-old hominin cranium from Woranso-Mille, Ethiopia. Nature, 573(7773), 214-219.
	s10*	De Miguel, C., & Henneberg, M. (2001). Variation in hominid brain size: how much is due to method?. Homo, 52(1), 3-58.
	s11	Beaudet, A., Clarke, R. J., De Jager, E. J., Bruxelles, L., Carlson, K. J., Crompton, R., ... & Stratford, D. (2019). The endocast of StW 573 (“Little Foot”) and hominin brain evolution. Journal of human evolution, 126, 112-123.
	s12	Rightmire, G. P., de Leon, M. S. P., Lordkipanidze, D., Margvelashvili, A., & Zollikofer, C. P. (2017). Skull 5 from Dmanisi: Descriptive anatomy, comparative studies, and evolutionary significance. Journal of Human Evolution, 104, 50-79.
	s13	Hawks, J., Elliott, M., Schmid, P., Churchill, S. E., de Ruiter, D. J., Roberts, E. M., ... & Berger, L. R. (2017). New fossil remains of Homo naledi from the Lesedi Chamber, South Africa. Elife, 6, e24232.
	s14	Falk, D., Hildebolt, C., Smith, K., Morwood, M. J., Sutikna, T., Brown, P., ... & Prior, F. (2005). The brain of LB1, Homo floresiensis. Science, 308(5719), 242-245.
	s15	Rightmire, G. P. (2004). Brain size and encephalization in early to Mid‐Pleistocene Homo. American Journal of Physical Anthropology, 124(2), 109-123.
	* The values analyzed correspond to the means for the different estimates for a given specimen.
